# Supplementary material
Source: MDPI journal article supplement (https://www.mdpi.com/2073-4433/9/12/485)
Supplement: s1 [file s1]

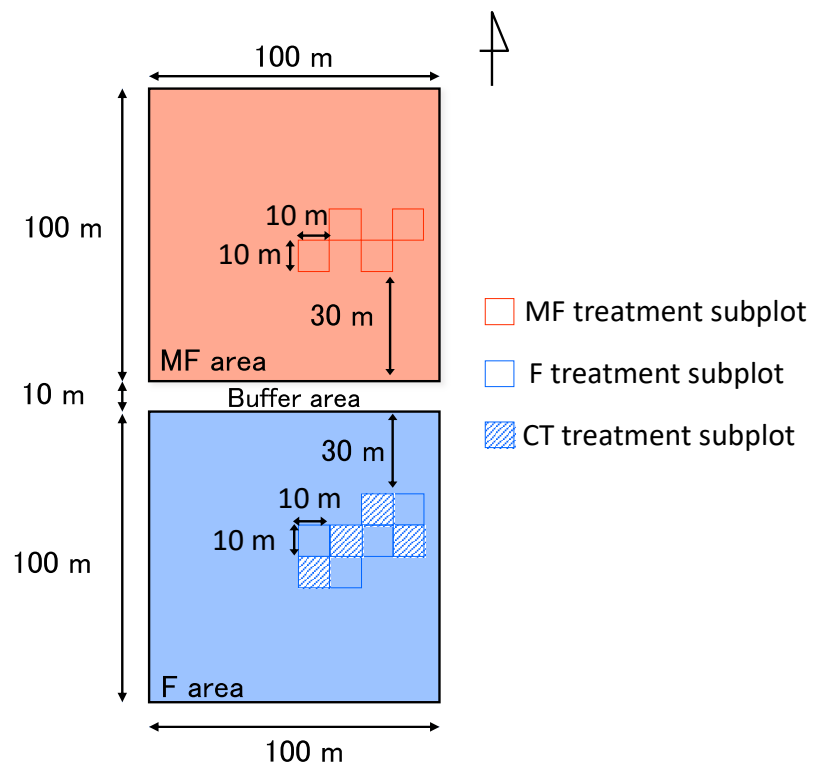

Figure S1 Layout of the treatment subplots in the field sampling. The gas, water, soil samples were taken around the center of each subplot. F area had been managed with only chemical fertilizer, and MF area had been managed with combined application of chemical fertilizer and beef cattle manure. These nutrient management were kept for 8 years before this study since 2005 and it continued during this study until 2016.

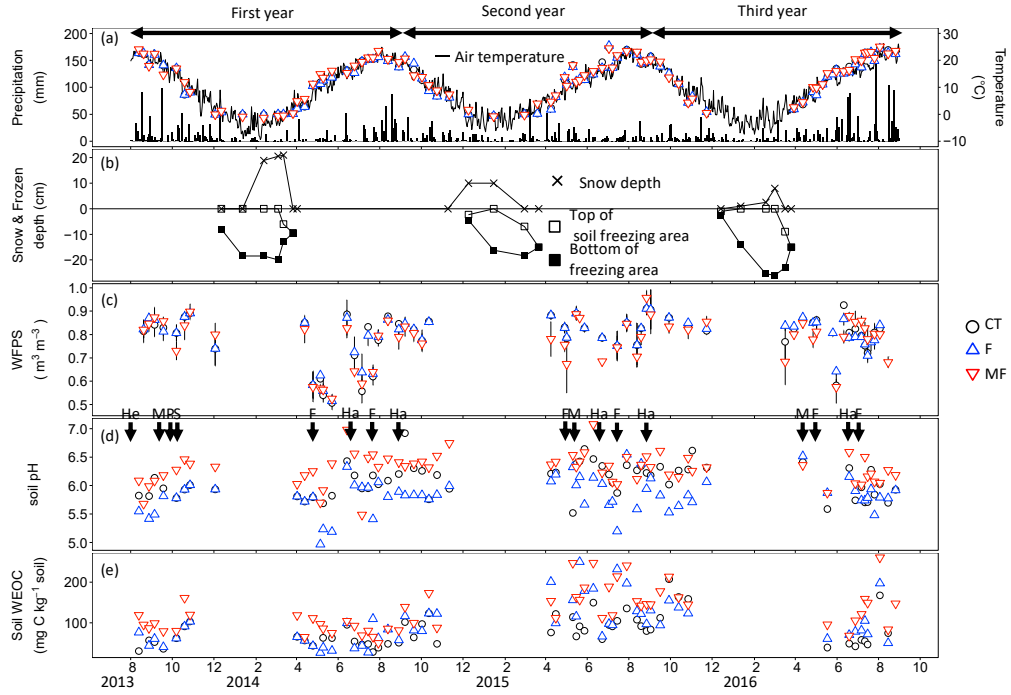

Figure S2 Daily change of precipitation, air and soil temperature depth (a), snow and soil freezing depth (b), water-filled pore space (WFPS) (c), soil pH (d), soil water extractable organic carbon (WEOC) concentration (e). Error bar show standard deviation. CT is unfertilized control plots ( $\circ$ ); F is chemical fertilizer plots ( $\Delta$ ); MF is combined manure and chemical fertilizer plots ( $\nabla$ ). Black arrows for letters indicates the timing of management as He: Herbicide application, P: Plowing, S: Seeding, F: Chemical fertilizer application, M: Manure application, Ha: Harvest.

Table S1 Seasonal cumulative N<sub>2</sub>O emission and NO<sub>3</sub>–N leaching and their contribution to annual cumulative value (%).

| Variety     |            | N <sub>2</sub> O Emission (kg N <sub>2</sub> O–N ha <sup>-1</sup> ) |               |               |              |              |               | Nitrate Nitrogen Leaching (kg NO <sub>3</sub> –N ha <sup>-1</sup> year <sup>-1</sup> ) |   |    |    |   |    |
|-------------|------------|---------------------------------------------------------------------|---------------|---------------|--------------|--------------|---------------|----------------------------------------------------------------------------------------|---|----|----|---|----|
|             |            | CT                                                                  | F             | MF            | CT           | F            | MF            | CT                                                                                     | F | MF | CT | F | MF |
| First year  | Renovation | 3.77 (57.9%)                                                        | 4.35 (54.5%)  | 10.58 (80.7%) | 2.03 (31.2%) | 2.03 (31.2%) | 10.81 (62.6%) |                                                                                        |   |    |    |   |    |
|             | G3         | 0.25 (3.9%)                                                         | 0.25 (3.2%)   | 0.19 (1.5%)   | 1.59 (24.4%) | 1.59 (24.4%) | 2.77 (16.0%)  |                                                                                        |   |    |    |   |    |
|             | Winter     | 0.04 (0.7%)                                                         | 0.04 (0.5%)   | -0.10 (-0.8%) | 0.00 (0.0%)  | 0.00 (0.0%)  | 0.00 (0.0%)   |                                                                                        |   |    |    |   |    |
|             | Thawing    | 1.67 (25.6%)                                                        | 1.67 (20.9%)  | 0.86 (6.6%)   | 2.86 (43.8%) | 2.86 (43.8%) | 3.49 (20.2%)  |                                                                                        |   |    |    |   |    |
|             | G1         | 0.83 (12.7%)                                                        | 0.50 (6.3%)   | 1.54 (11.8%)  | 0.02 (0.3%)  | 0.02 (0.3%)  | 0.17 (1.0%)   |                                                                                        |   |    |    |   |    |
|             | G2         | -0.05 (-0.7%)                                                       | 1.17 (14.6%)  | 0.04 (0.3%)   | 0.02 (0.3%)  | 0.02 (0.3%)  | 0.02 (0.1%)   |                                                                                        |   |    |    |   |    |
| Second year | G3         | 0.21 (21.3%)                                                        | 0.49 (21.5%)  | 0.25 (9.8%)   | 0.00 (1.1%)  | 0.00 (1.1%)  | 0.00 (0.0%)   |                                                                                        |   |    |    |   |    |
|             | Winter     | 0.04 (3.6%)                                                         | -0.17 (-7.3%) | 0.52 (20.7%)  | 0.00 (0.0%)  | 0.00 (0.0%)  | 0.00 (0.0%)   |                                                                                        |   |    |    |   |    |
|             | Thawing    | 0.21 (21.3%)                                                        | 0.76 (33.2%)  | 0.13 (5.1%)   | 0.15 (86.7%) | 0.15 (86.7%) | 0.16 (31.5%)  |                                                                                        |   |    |    |   |    |
|             | G1         | 0.33 (32.7%)                                                        | 0.35 (15.4%)  | 0.90 (35.7%)  | 0.00 (0.0%)  | 0.00 (0.0%)  | 0.02 (3.3%)   |                                                                                        |   |    |    |   |    |
|             | G2         | 0.21 (21.1%)                                                        | 0.85 (37.2%)  | 0.72 (28.7%)  | 0.02 (12.2%) | 0.02 (12.2%) | 0.33 (65.2%)  |                                                                                        |   |    |    |   |    |
|             | G3         | 0.54 (9.3%)                                                         | 0.49 (3.6%)   | 0.47 (13.6%)  | 0.00 (0.0%)  | 0.00 (0.0%)  | 0.00 (0.0%)   |                                                                                        |   |    |    |   |    |
| Third year  | Winter     | 1.57 (27.0%)                                                        | 1.35 (10.0%)  | 0.28 (7.9%)   | 0.00 (0.0%)  | 0.00 (0.0%)  | 0.00 (0.0%)   |                                                                                        |   |    |    |   |    |
|             | Thawing    | 0.58 (9.9%)                                                         | 0.33 (2.5%)   | 0.52 (14.9%)  | 0.27 (24.8%) | 0.27 (24.8%) | 0.09 (4.0%)   |                                                                                        |   |    |    |   |    |
|             | G1         | 2.68 (46.0%)                                                        | 2.51 (18.5%)  | 0.83 (23.8%)  | 0.74 (67.6%) | 0.74 (67.6%) | 0.41 (18.0%)  |                                                                                        |   |    |    |   |    |
|             | G2         | 0.45 (7.7%)                                                         | 8.88 (65.5%)  | 1.39 (39.8%)  | 0.08 (7.6%)  | 0.08 (7.6%)  | 1.77 (78.1%)  |                                                                                        |   |    |    |   |    |
|             |            |                                                                     |               |               |              |              |               |                                                                                        |   |    |    |   |    |
|             |            |                                                                     |               |               |              |              |               |                                                                                        |   |    |    |   |    |

The definition of each season: Renovation: The period from when the herbicide was applied (13 August) to the first sampling date after re-seeding (7 October) The crop growing season is the period of time with 7 days moving average of daily air temperature above 5 °C. And the growing season was divided into 3 periods as below. G1: The period from the beginning of the growing season to the first crop harvest. G2: The period from the first harvest to the second harvest G3: The period from the second harvest to the end of the growing season. The non-growing season was divided into 2 periods as winter and thawing period. Winter: The period from the end of G3 to the end of February when maximum temperatures recorded reached 0 °C. Thawing: The period from when minimum daily temperatures reached 0 °C, to the time when soils were completely melted (minimum soil temperatures ~5 °C).

Table S2 Annual heterotrophic respiration (RH) in unfertilized control treatment (CT), chemical fertilizer treatment (F) and combined manure and chemical fertilizer treatment (MF). Values are mean ± standard deviation. Values with the same letters are not significantly different (p < 0.05).

| Treatment     | RH (Mg C ha <sup>-1</sup> year <sup>-1</sup> ) |                         |                        |
|---------------|------------------------------------------------|-------------------------|------------------------|
|               | First Year (2013–2014)                         | Second Year (2014–2015) | Third Year (2015–2016) |
| CT            | 5.56 ± 0.76 cde                                | 4.65 ± 0.63 e           | 7.21 ± 0.77 abc        |
| F             | 5.79 ± 0.67 bcde                               | 5.03 ± 0.42 de          | 7.62 ± 1.41 ab         |
| MF            | 8.55 ± 0.56 a                                  | 6.69 ± 0.98 bcd         | 8.84 ± 0.37 ab         |
| ANOVA         | df                                             | F value                 | p-value                |
| Treatment (T) | 2                                              | 28.2                    | < 0.001                |
| Year (Y)      | 2                                              | 26                      | < 0.001                |
| T × Y         | 4                                              | 1.15                    | 0.36                   |
